# Supplementary material
Source: publisher figshare collection journal article supplement (https://acs.figshare.com/ndownloader/files/4041688)

# New Metal Chalcogenides $\text{Ba}_4\text{CuGa}_5\text{Q}_{12}$ ( $\text{Q} = \text{S}, \text{Se}$ ) Displaying Strong Infrared Non-Linear Optical Responses

Shu-Ming Kuo<sup>†</sup>, Yu-Ming Chang<sup>§</sup>, In Chung<sup>‡</sup>, Joon-Ik Jang<sup>ζ</sup>, Bo-Hsian Her<sup>†</sup>,  
Siao-Han Yang<sup>†</sup>, John, B. Ketterson<sup>ζ</sup>, Mercouri G. Kanatzidis<sup>‡</sup>, and Kuei-Fang Hsu<sup>†,\*</sup>

*Department of Chemistry, National Cheng Kung University, Tainan 701, Taiwan*

*Department of Chemistry, and Department of Physics and Astronomy, Northwestern University, Evanston, Illinois 60208, USA*

*Center for Condensed Matter Sciences, National Taiwan University, Taipei 106, Taiwan*

## Supplementary Data

**Figure S1** Powder X-ray diffraction patterns of **1** from (a) the measured data, and (b) the calculated data of single-crystal X-ray structural analyses.

**Figure S2** Powder X-ray diffraction patterns of **2** from (a) the measured data, and (b) the calculated data of single-crystal X-ray structural analyses.

**Figure S3** Powder X-ray diffraction patterns of **3** from (a) the measured data, and (b) the calculated data of single-crystal X-ray structural analyses.

**Figure S4** The SHG response measured as a function of the incident laser intensity of (a) **1**, (b) **2**, (c) **3**, and (d)  $\text{AgGaS}_2$  at 532 nm.

**Figure S1** Powder X-ray diffraction patterns of **1** from (a) the measured data, and (b) the calculated data of single-crystal X-ray structural analyses.

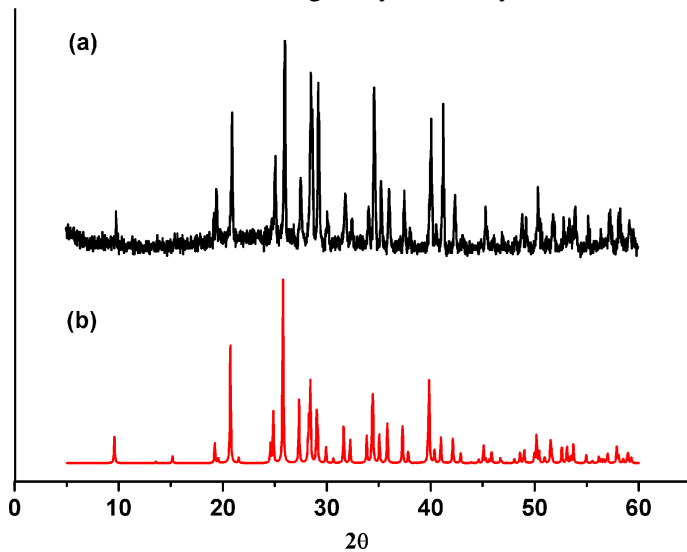

**Figure S2** Powder X-ray diffraction patterns of **2** from (a) the measured data, and (b) the calculated data of single-crystal X-ray structural analyses.

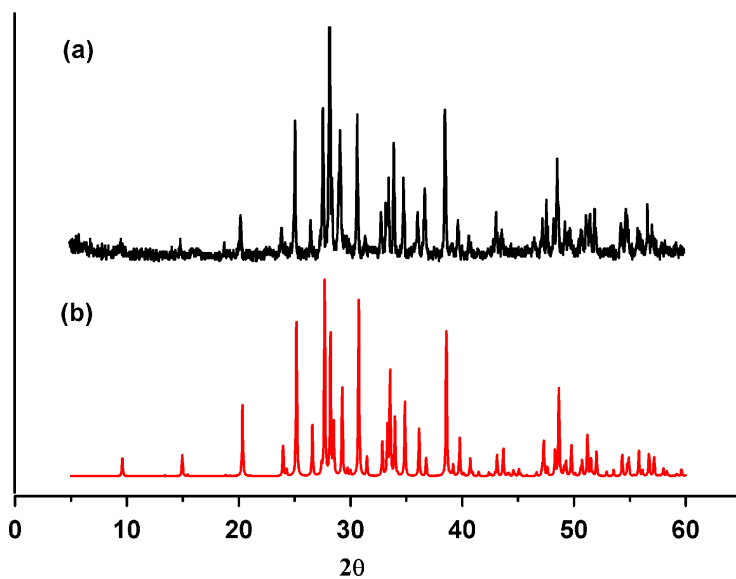

**Figure S3** Powder X-ray diffraction patterns of **3** from (a) the measured data, and (b) the calculated data of single-crystal X-ray structural analyses.

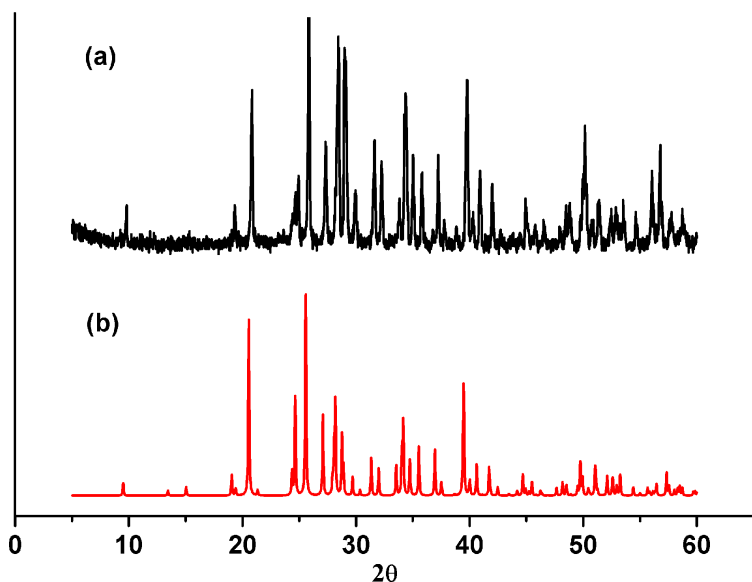

**Figure S4** The SHG response measured as a function of the incident laser (1064 nm) intensity of (a) **1**, (b) **2**, (c) **3**, and (d) AgGaS<sub>2</sub>. The colors represent the data collected at various spots.

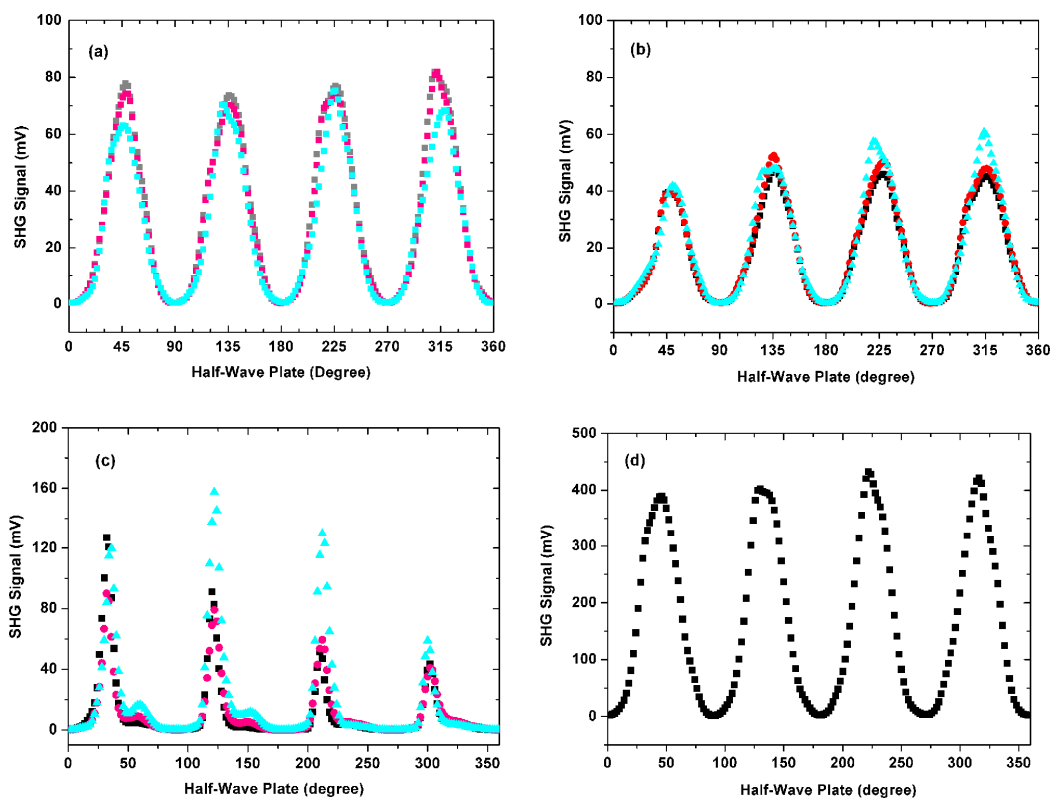

Supplement: Supplementary file 1 [file 4041688]
